# Supplementary material for: Drainage rearrangement in an intra-continental mountain belt: A case study from the central South Tian Shan, Kyrgyzstan
Source: Copernicus journal article supplement (doi:10.5194/egusphere-2023-2651), 2024-01-19

*Supplement of*

## **Drainage rearrangement in an intra-continental mountain belt: A case study from the southern Central Tian Shan, Kyrgyzstan**

Lingxiao Gong<sup>1</sup>, Peter van der Beek<sup>1</sup>, Taylor F. Schildgen<sup>1,2</sup>, Edward R. Sobel<sup>1</sup>, Simone Racano<sup>1</sup>, Apolline Mariotti<sup>2</sup>

<sup>1</sup>Institut für Geowissenschaften, Universität Potsdam, Potsdam, 14476, Germany

<sup>2</sup>GFZ German Research Centre for Geosciences, Potsdam, 14473, Germany

*Correspondence to:* Lingxiao Gong (gong@uni-potsdam.de)

**Figure S1** best-fit concavity from chi plot.

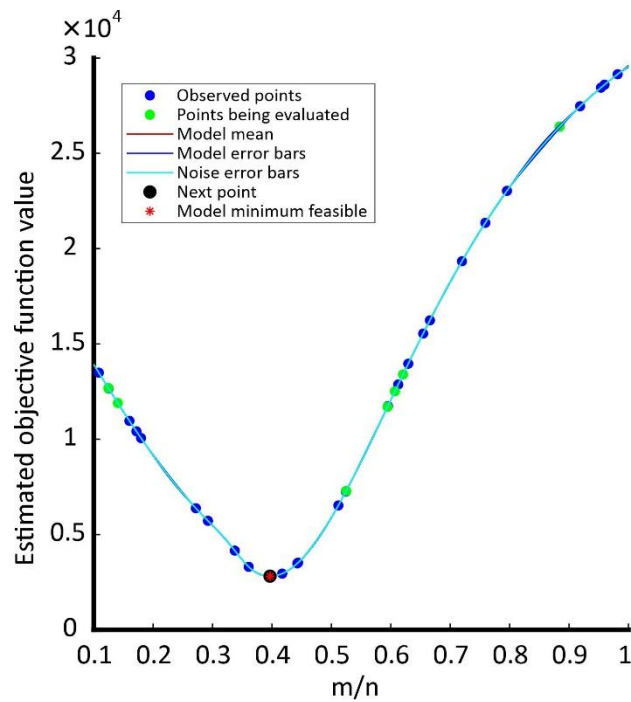

**Figure S2** (a) Satellite image of the Inylchek valley from Google Earth showing tributary hanging valleys; (b) Field example of hanging tributary valleys from the Barskoon glacial valley, west of our study area. In both images, white dots with black edges show the location of glacial knickpoints.

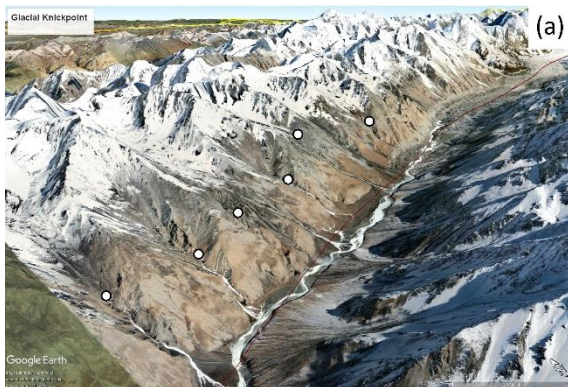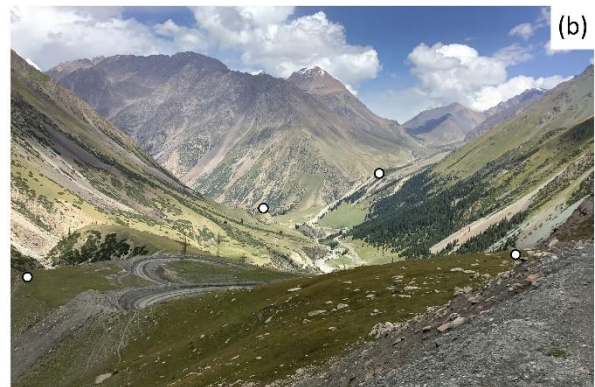

**Figure S3** Knickpoints identified in the Saryjaz catchment with their inferred origins. See text for discussion. Note that “trivial knickpoint” here means the vertical-step knickpoints which could correspond to local river steepening.

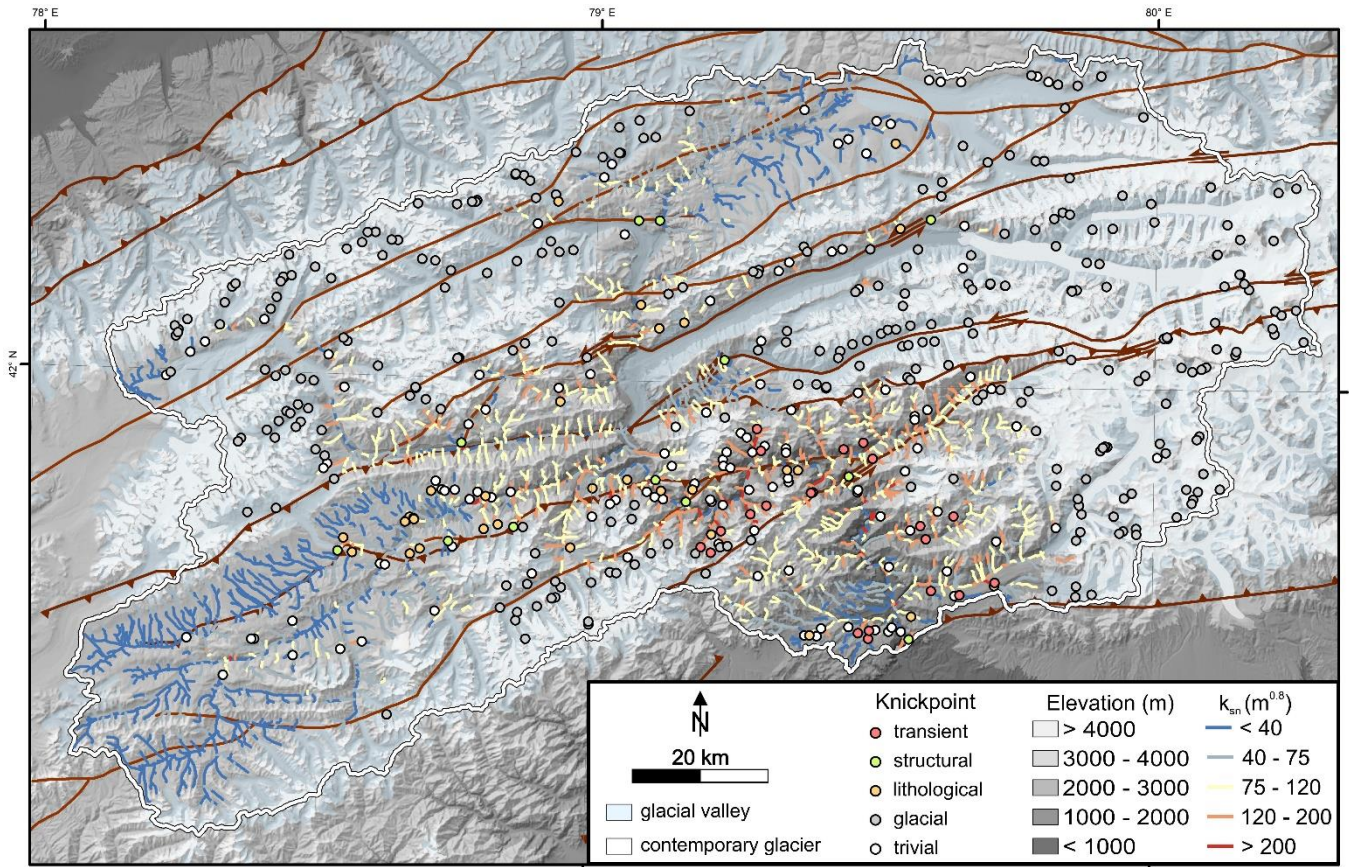

**Figure S4**  $\chi$ -plots of Saryjaz tributaries downstream of the “U-turn” that show major slope-break knickpoints. Red lines show linear regressions (in  $\chi$ -space) of relict upstream reaches to the outlet of tributaries that were used to quantify incision depths. See Figure 5 for the locations of sub-catchments and knickpoints.

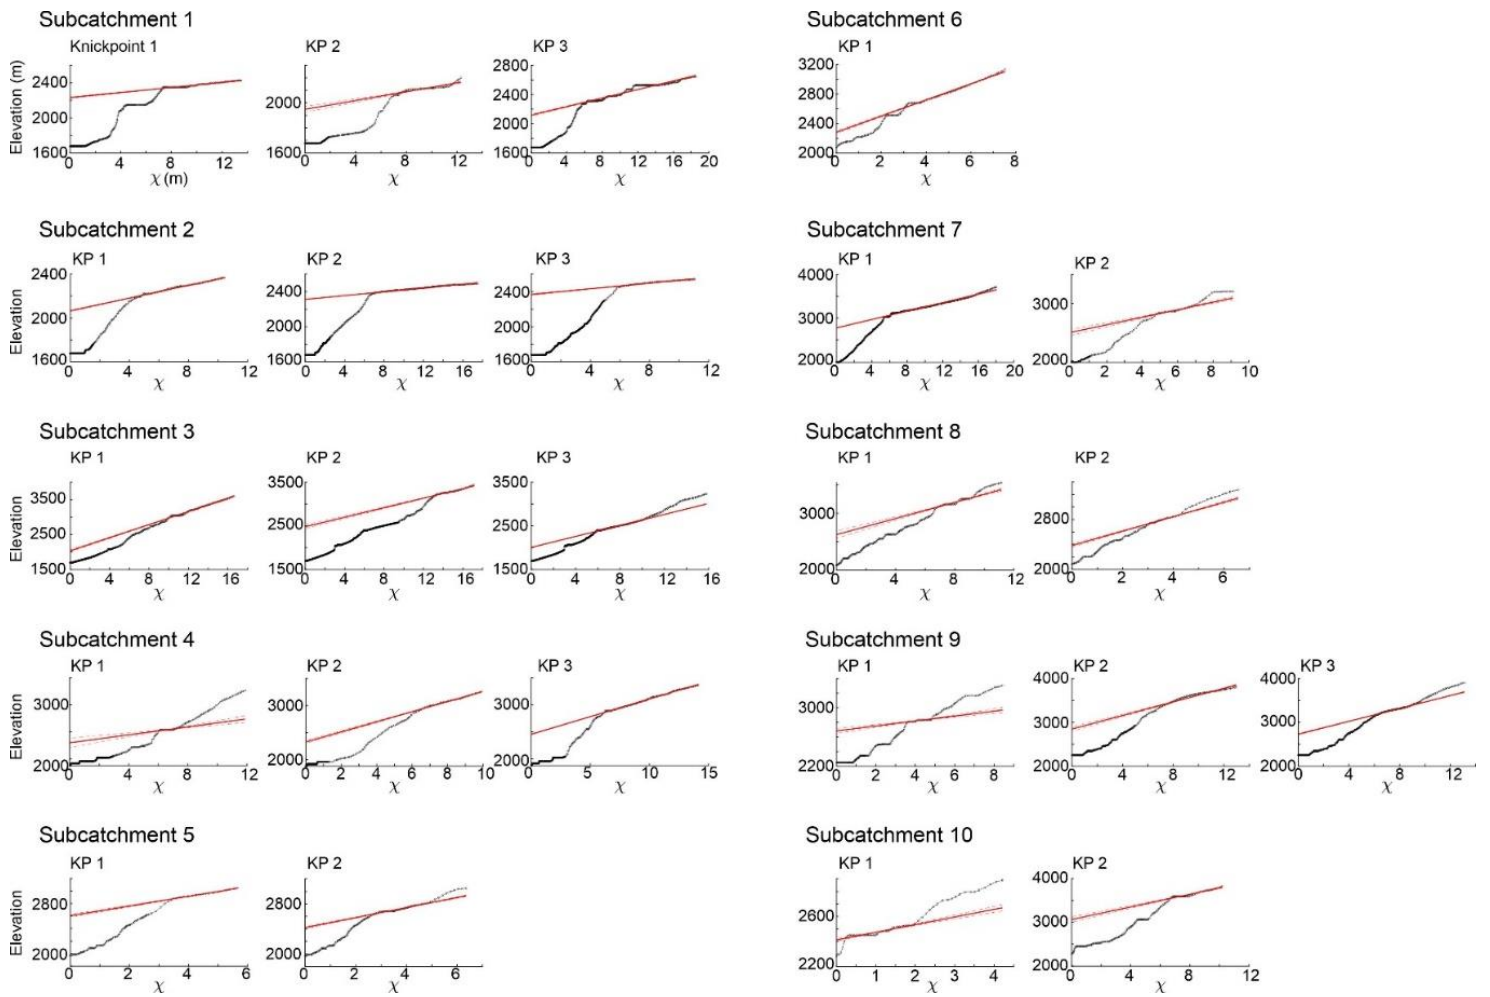

**Figure S5** Box plot of  $k_{sn}$  values downstream and upstream of the slope-break knickpoints in the tributaries shown in Figures 5 and S4. See Table 1 for the values.

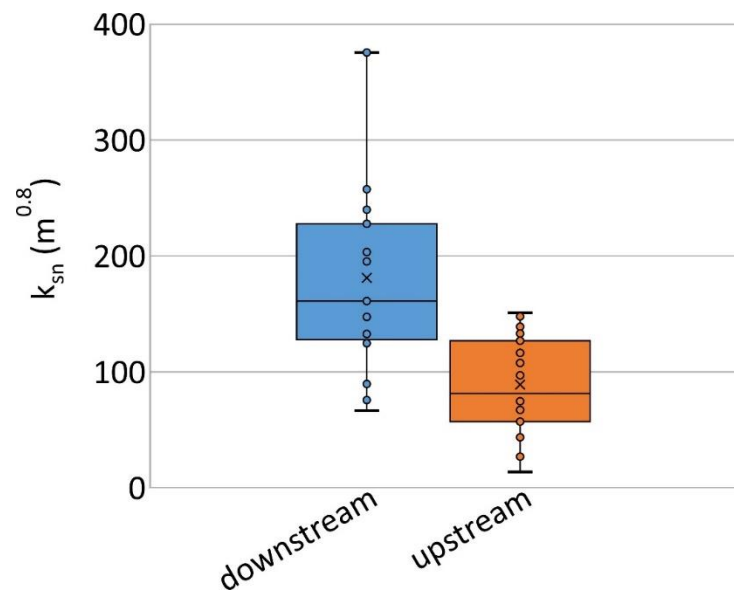



**Figure S6** Google Earth image of the Saryjaz River in the vicinity of the “U-turn”, showing inferred sedimentary remnants east of and high above the river. White arrows in rivers indicate flow directions.

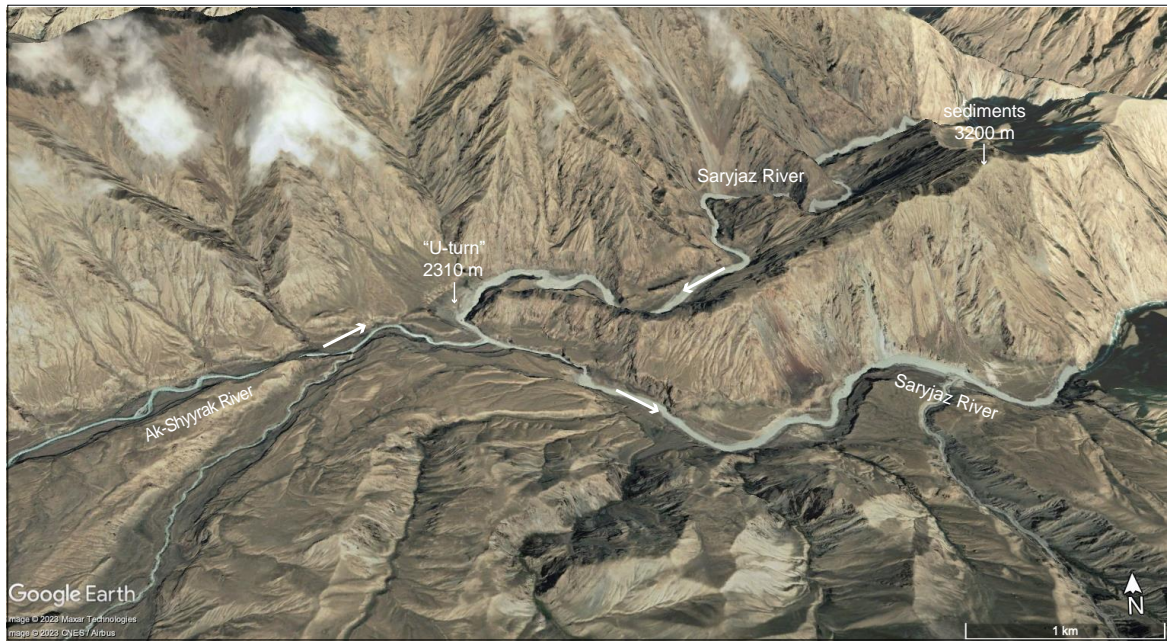



**Figure S7** Current drainage divide (white line) between the Saryjaz and Naryn catchments, with streams colored by (a) normalized channel steepness  $k_{sn}$ , and (b)  $\chi$ -value. Basemap source: Esri, Maxar, Earthstar Geographics, and the GIS User Community.

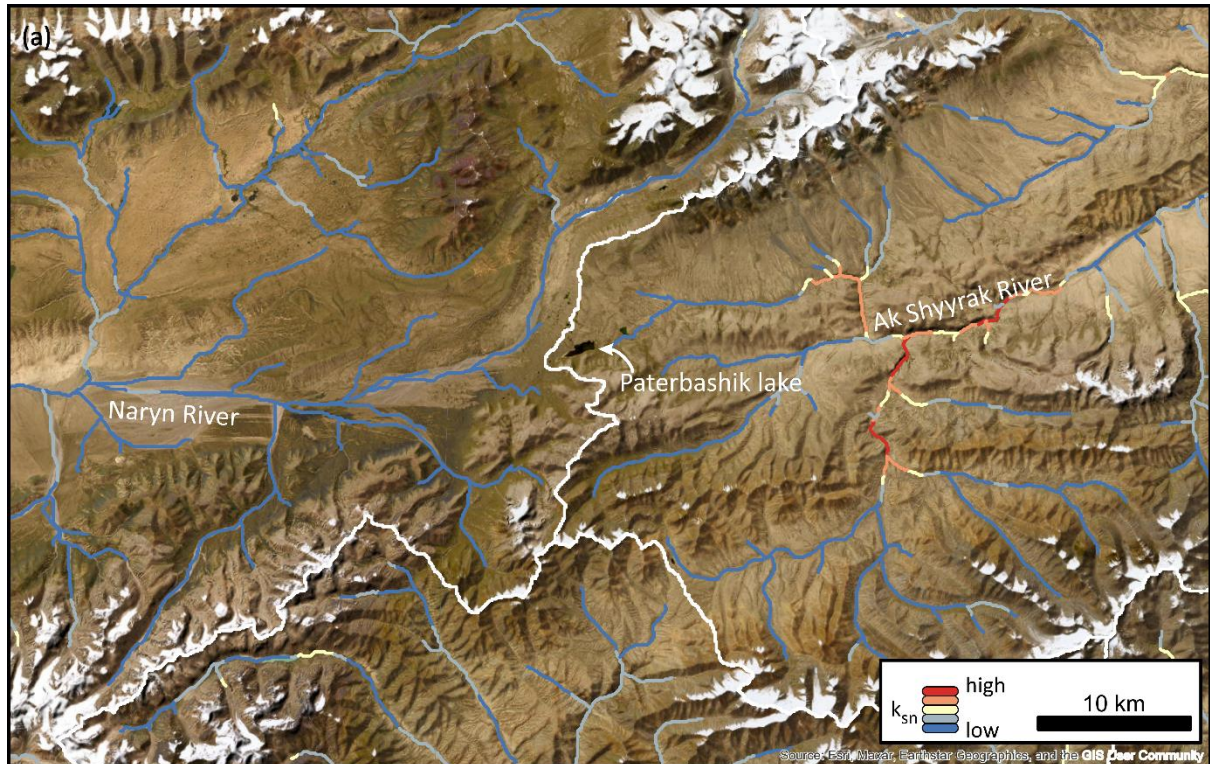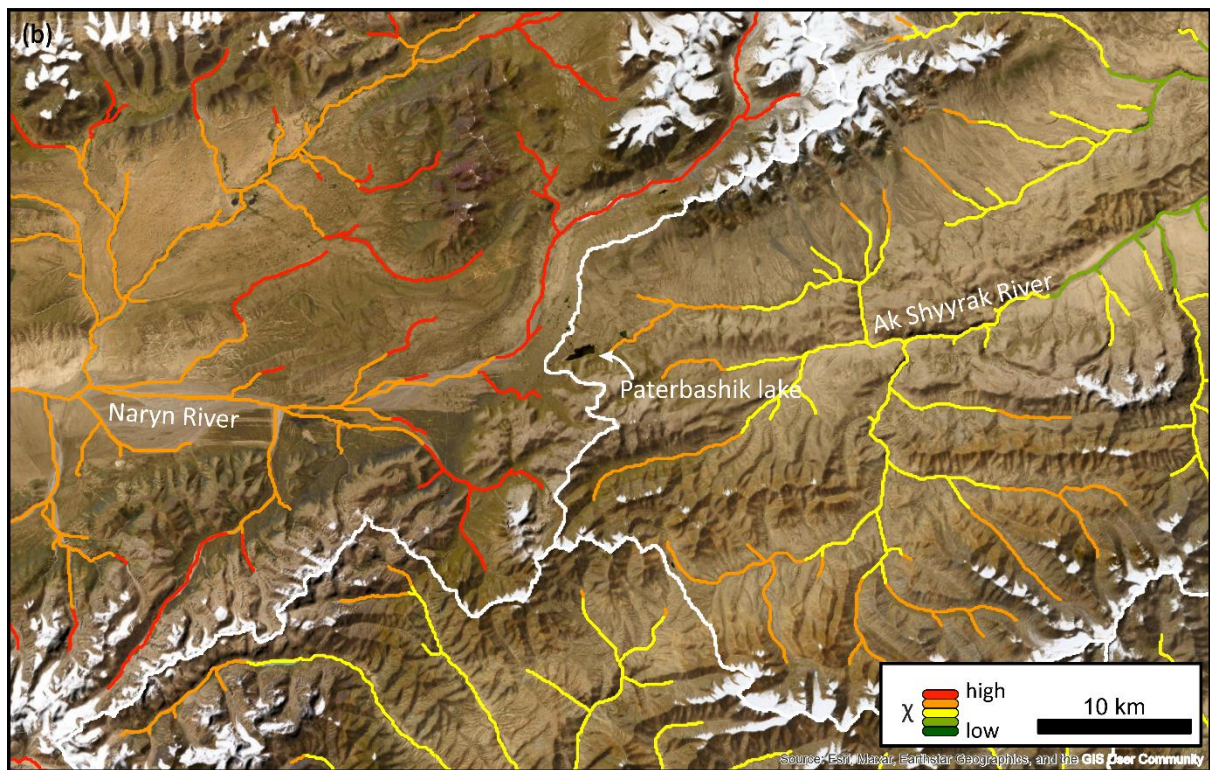

Supplement: Supplementary file 1 [file egusphere-2023-2651-supplement.pdf]
