# Supplementary material for: Drainage rearrangement in an intra-continental mountain belt: A case study from the central South Tian Shan, Kyrgyzstan
Source: Copernicus journal article supplement (doi:10.5194/egusphere-2023-2651), 2024-01-19
Supplement: Supplementary file [file egusphere-2023-2651-RC1-supplement.pdf]

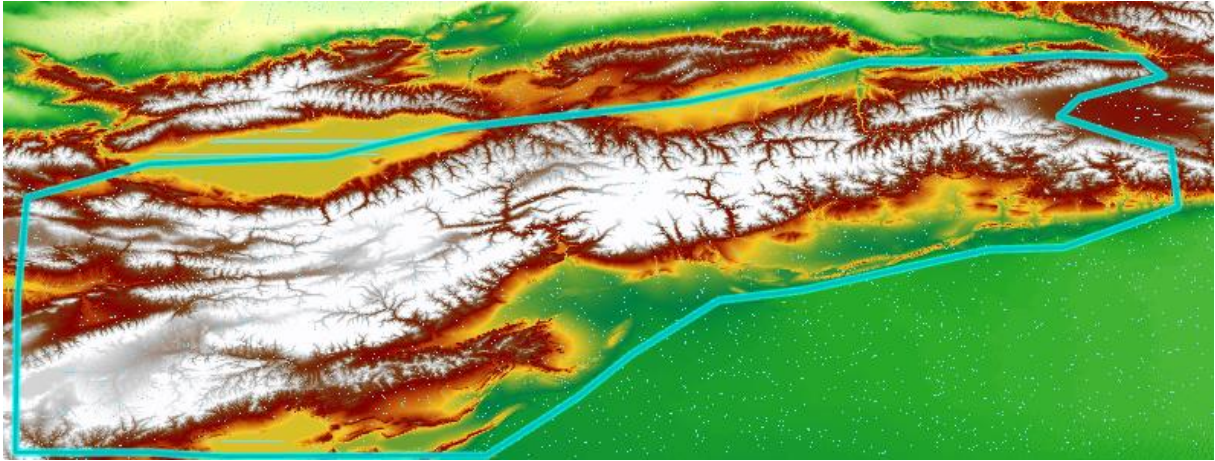

Fig. A

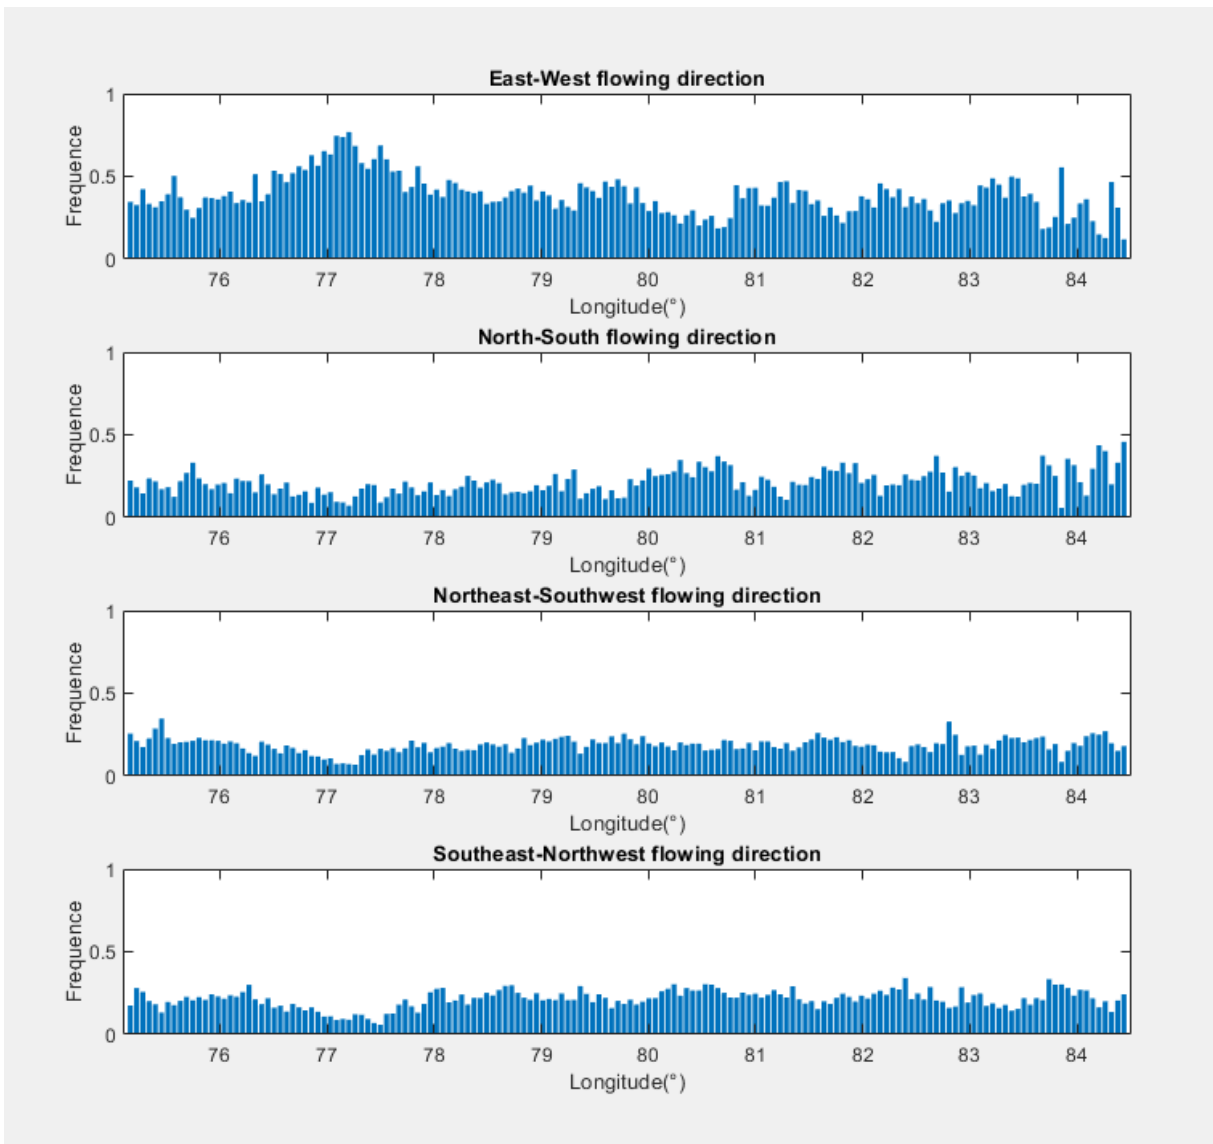

Fig. B

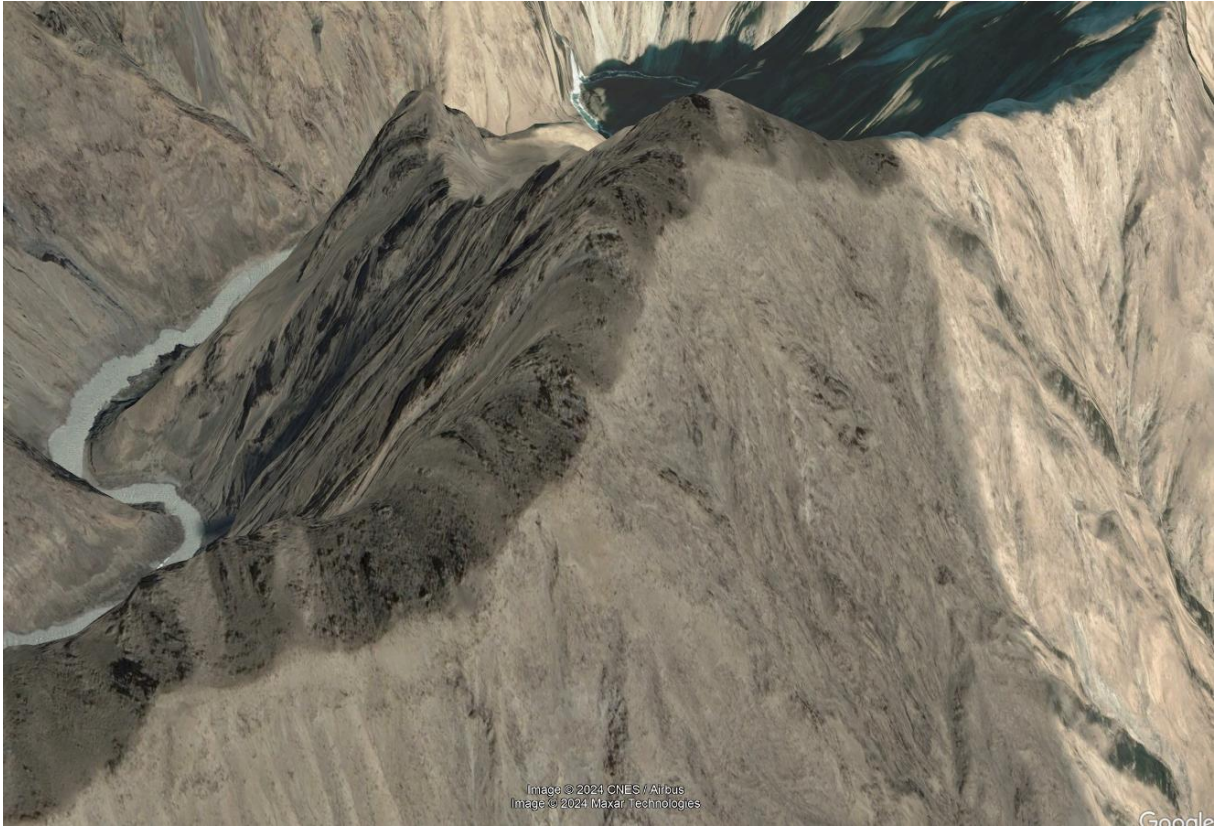

Fig. C
